# Supplementary material for: Structural diversities in Cu(i) and Ag(i) sulfonate coordination polymers and their anion exchange properties
Source: Royal Society of Chemistry journal article supplement (doi:10.1039/c5ce01452b), 2015-01-01
Supplement: c5ce01452b1.pdf [file c5ce01452b1.pdf]

## Supporting information's for the manuscript

### Structural diversities in Cu(I) and Ag(I) sulfonate coordination polymers and anion exchange properties

Suryabhan Singh<sup>a\*</sup> and Rajendran Karthik<sup>a</sup>

<sup>a</sup>Framework Solids Laboratory, Solid State and Structural Chemistry Unit, Indian Institute of Science Bangalore, Bangalore-560012, India

**Table S1:** TGA analysis for the compounds

| Compounds | Temperature (°C) | Wt % loss (calc % loss) | Corresponding moieties                    |
|-----------|------------------|-------------------------|-------------------------------------------|
| <b>1</b>  | 30-100           | 2.9 (2.5)               | H <sub>2</sub> O                          |
|           | 330-366          | 29.7 (27)               | H <sub>2</sub> O + 4,4'-Bipyridyl         |
|           | 366-420          | 72                      | All H <sub>2</sub> O and organic moieties |
| <b>2</b>  | 30-118           | 4.4 (4.5)               | 2H <sub>2</sub> O                         |
|           | 231-367          | 44.7 (43.5)             | 2(4,4'-Bipyridyl)                         |
|           | 267-473          | 73                      | All H <sub>2</sub> O and organic moieties |
| <b>3</b>  | 30-246           | 4.6 (4.58)              | 4H <sub>2</sub> O                         |
|           | 291-359          | 17.8 (18.5)             | 2H <sub>2</sub> O + 4,4'-Azobipyridyl     |
|           | 359-598          | 69.4 (68.7)             | 3(4,4'-Azobipyridyl) + bds                |
|           | 600-710          | 74.2                    | All H <sub>2</sub> O and organic moieties |
| <b>4</b>  | 30-100           | 6.3 (6)                 | 3H <sub>2</sub> O                         |
|           | 244-327          | 28.6 (28.4)             | H <sub>2</sub> O + 4,4'-Azobipyridyl      |
|           | 327-460          | 49.5 (49.3)             | 4,4'-Azobipyridyl                         |
|           | 460-621          | 73.8                    | All H <sub>2</sub> O and organic moieties |
| <b>5</b>  | 30-95            | 6.1 (6.2)               | 3H <sub>2</sub> O                         |
|           | 306-435          | 47.6 (48.5)             | BPE                                       |
|           | 435-560          | 69                      | All H <sub>2</sub> O and organic moieties |
| <b>6</b>  | 3-100            | 3.1 (2.9)               | 3H <sub>2</sub> O                         |
|           | 320-368          | 30.1 (30)               | 6H <sub>2</sub> O + 2TBP                  |
|           | 368-420          | 72.7                    | All H <sub>2</sub> O and organic moieties |

**Table S2:** UV-visible bands for **1-6**

| Compounds | Absorption bands (nm)             |
|-----------|-----------------------------------|
| 1         | 420(broad), 327(shoulder) and 248 |
| 3         | 324 and 250                       |
| 2         | 486(broad), 329(shoulder) and 248 |
| 4         | 492, 375 and 259                  |
| 5         | 461(broad), 352, 250              |
| 6         | 438, 275                          |

**Table S3:** Selected bond lengths and bond angles for **1-6**

| Compounds | Bond length (Å)  | Bond angle (°)       |
|-----------|------------------|----------------------|
| 1         | Cu1-N1 1.910(6)  | N1-Cu1-N2 169.5(2)   |
|           | Cu1-N2 1.915(6)  | O1-Cu1-O_1 98.13     |
|           | Cu1-O1 2.561     | N4-Cu2-N3 171.1(2)   |
|           | Cu_1-O1 2.490    | O4-Cu2-Ow1 80.40     |
|           | Cu2-N3 1.911(6)  |                      |
|           | Cu2-N4 1.903(6)  |                      |
|           | Cu2-O2 2.771     |                      |
|           | Cu2-Ow1 2.563    |                      |
| 2         | Ag1-N1 2.149(2)  | N1-Ag1-N2 170.80(8)  |
|           | Ag1-N2 2.156(2)  | O1-Ag1-O_1 103.98    |
|           | Ag2-N4 2.151(2)  | O1-Ag1-N1 92.29      |
|           | Ag2-N3 2.154(2)  | O1-Ag1-N2 94.08      |
|           | Ag1-O1 2.670     | O_1-Ag1-N1 100.50    |
|           | Ag1-O_1 2.682    | O_1-Ag1-N2 84.39     |
|           | Ag2-O4 2.862     | N4-Ag2-N3 173.88(9)  |
|           | Ag2-Ow1 2.780    | O4-Ag2-Ow1 178.02    |
|           | Ag1-Ag1 3.296(5) | O4-Ag2-N3 90.99      |
|           | O4-Ag2-N4 86.57  |                      |
|           | Ow1-Ag2-N3 87.73 |                      |
|           | Ow1-Ag2-N4 94.55 |                      |
| 3         | Cu1-N1 1.909(3)  | N8-Cu1-N1 164.70(17) |
|           | Cu1-O7 2.376(4)  | N8-Cu1-O7 97.06(15)  |
|           | Cu2-N5 1.907(4)  | N1-Cu1-O7 98.13(15)  |
|           | Cu2-N4 1.917(4)  | N5-Cu2-N4 165.1(2)   |
|           | Cu2-O1 2.317(4)  | N5-Cu2-O1 98.89(17)  |
|           | Cu3-N12 1.907(3) | N4-Cu2-O1 96.00(17)  |

---

|          |                     |                        |
|----------|---------------------|------------------------|
|          | Cu3-N13 1.911(3)    | N12-Cu3-N13 166.33(17) |
|          | Cu3-O11 2.339(4)    | N12-Cu3-O11 99.10(15)  |
|          | Cu4-N16 1.895(4)    | N13-Cu3-O11 94.52(16)  |
|          | Cu4-N9 1.897(4)     | N16-Cu4-N9 168.37(19)  |
| <b>4</b> | Ag1-N1 2.149(4)     | N1 Ag1 N4 174.76(1)    |
|          | Ag1-N4 2.150(4)     | O1-Ag1-N1 89.93        |
|          | Ag1-O1 2.794        | O1-Ag1-N1 92.10        |
|          | Ag2-N5 2.139(4)     | N5 Ag2 N8 174.91(1)    |
|          | Ag2-N8 2.145(4)     | O6-Ag2-N5 91.71        |
|          | Ag2-O6 2.786        | O6-Ag2-N8 89.69        |
| <b>5</b> | Ag1-N1 2.133(10)    | N1-Ag1-N2 174.7(4)     |
|          | Ag1-N2 2.127(10)    | Ow1-Ag1-N1 92.38       |
|          | Ag1-Ow1 2.838       | Ow1-Ag1-N2 91.75       |
|          | Ag1-Ag_1 3.3537(11) |                        |
| <b>6</b> | Ag1-N1 2.146(5)     | N1-Ag1-N2 164.7(2)     |
|          | Ag1-N2 2.151(5)     | O1-Ag1-N1 102.12       |
|          | Ag1-O1 2.633        | O1-Ag1-N1 93.14        |
|          | Ag1-Ag1 3.211(10)   | N3 Ag2 N4 166.96(2)    |
|          | Ag2-N3 2.153(5)     | O4-Ag2-N3 100.03       |
|          | Ag2-N4 2.161(5)     | O4-Ag2-N4 92.88        |
|          | Ag2-O4 2.688        | N6-Ag3-N5 171.80(2)    |
|          | Ag3-N6 2.133(5)     | O7-Ag3-N5 97.43        |
|          | Ag3-N5 2.143(5)     | O7-Ag3-N6 90.51        |
|          | Ag3-Ag2 3.236(8)    | N8-Ag4-N7 171.81(19)   |
|          | Ag3-O7 2.817        | O11-Ag4-N7 94.11       |
|          | Ag4-N8 2.124(5)     | O11-Ag4-N8 87.18       |
|          | Ag4-N7 2.130(5)     |                        |
|          | Ag4-O11 2.824       |                        |
|          | Ag4-Ag4 3.162(12)   |                        |

---

**Table S4:** Hydrogen bond parameters

| Compounds | <i>D-H</i> ⋯ <i>A</i> | <i>H</i> ⋯ <i>A</i> (Å) | <i>D</i> ⋯ <i>A</i> (Å) | <i>D-H</i> ⋯ <i>A</i> (°) |
|-----------|-----------------------|-------------------------|-------------------------|---------------------------|
| 4         | Ow3-H7A⋯Ow4           | 1.86                    | 2.699(9)                | 171                       |
|           | Ow3-H7B⋯Ow2           | 2.03                    | 2.839(8)                | 158                       |
|           | Ow4-H8A⋯O6            | 2.23                    | 3.078(7)                | 172                       |
|           | Ow2-H9A⋯Ow1           | 1.85                    | 2.679(8)                | 164                       |
|           | Ow2-H9B⋯O3            | 2.33                    | 3.160(7)                | 166                       |
|           | Ow1-H10A⋯Ow4          | 2.03                    | 2.873(8)                | 169                       |
|           | Ow1-H10B⋯O2           | 2.14                    | 2.941(8)                | 158                       |
| 6         | Ow5-H00A⋯O8           | 2.11                    | 2.940(6)                | 165                       |
|           | Ow5-H00B⋯O3           | 2.04                    | 2.853(6)                | 161                       |
|           | Ow7-H00D⋯Ow6          | 2.02                    | 2.835(4)                | 161                       |
|           | Ow8-H00H⋯Ow9          | 2.04                    | 2.812(6)                | 151                       |
|           | Ow6-H00L⋯Ow7          | 2.07                    | 2.835(4)                | 149                       |

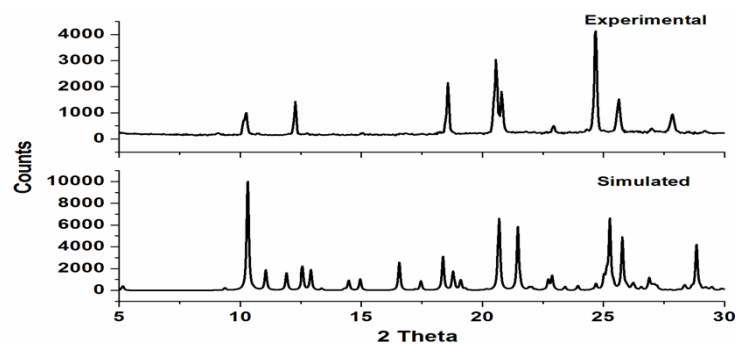

1

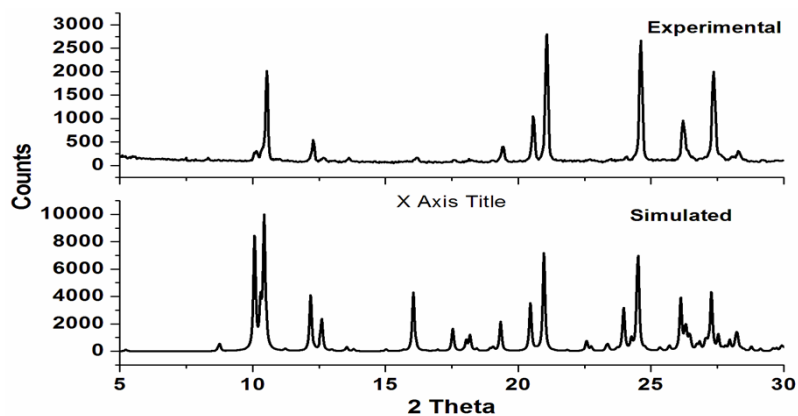

2

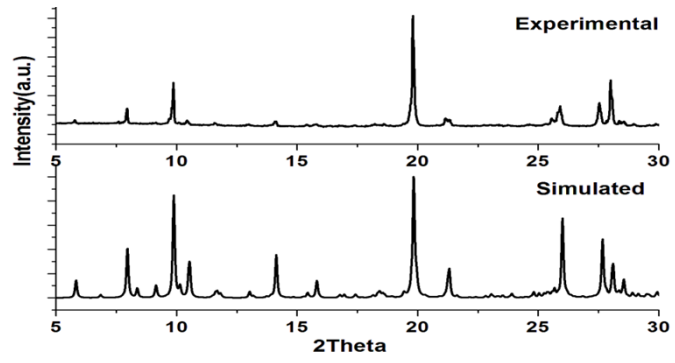

3

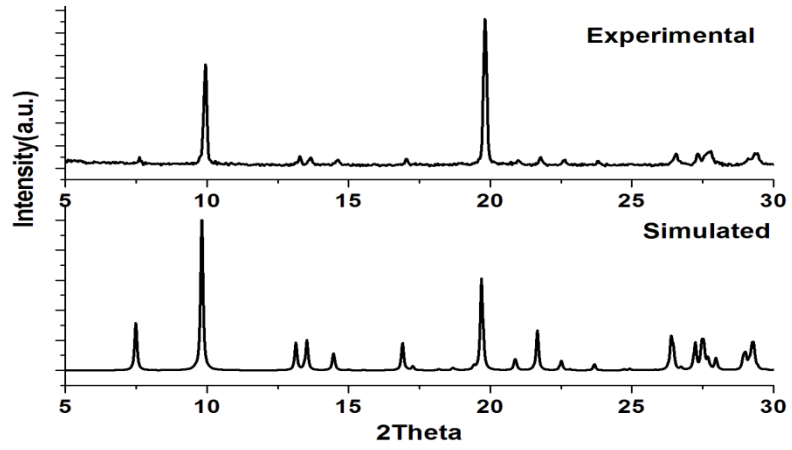

4

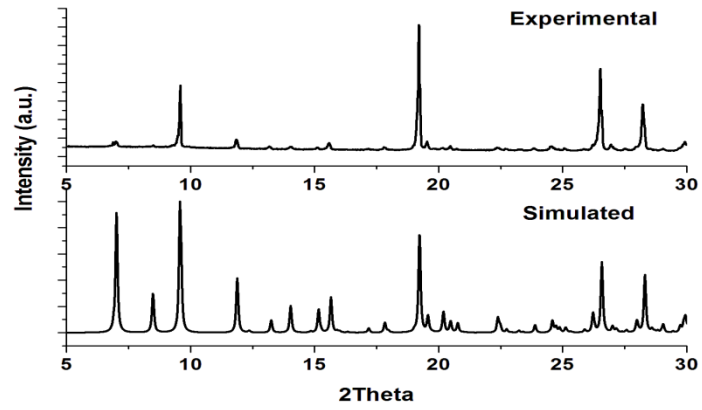

5

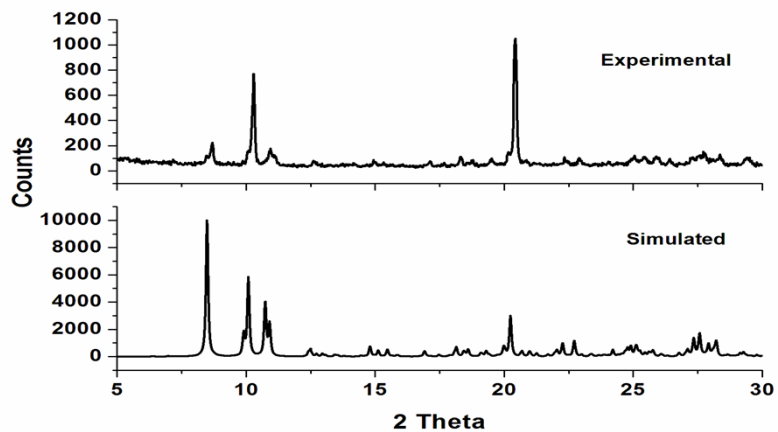

6

Figure S1 PXR D pattern of compounds 1-6

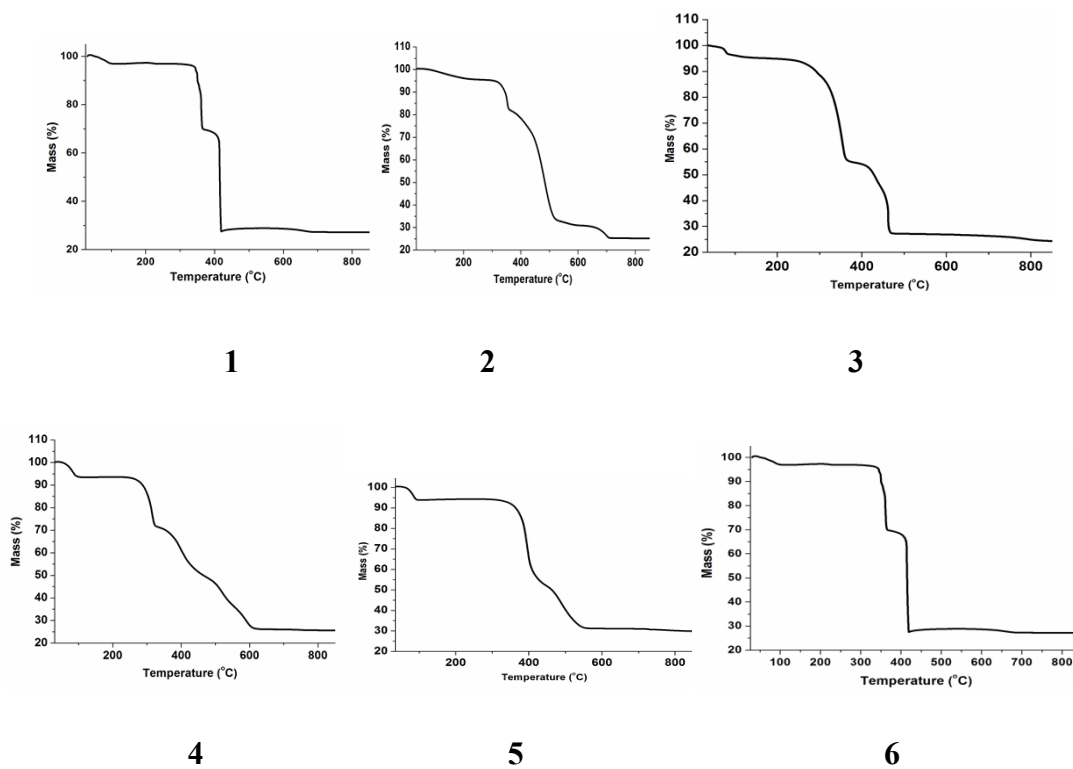

Figure S2 TGA plots for 1-6

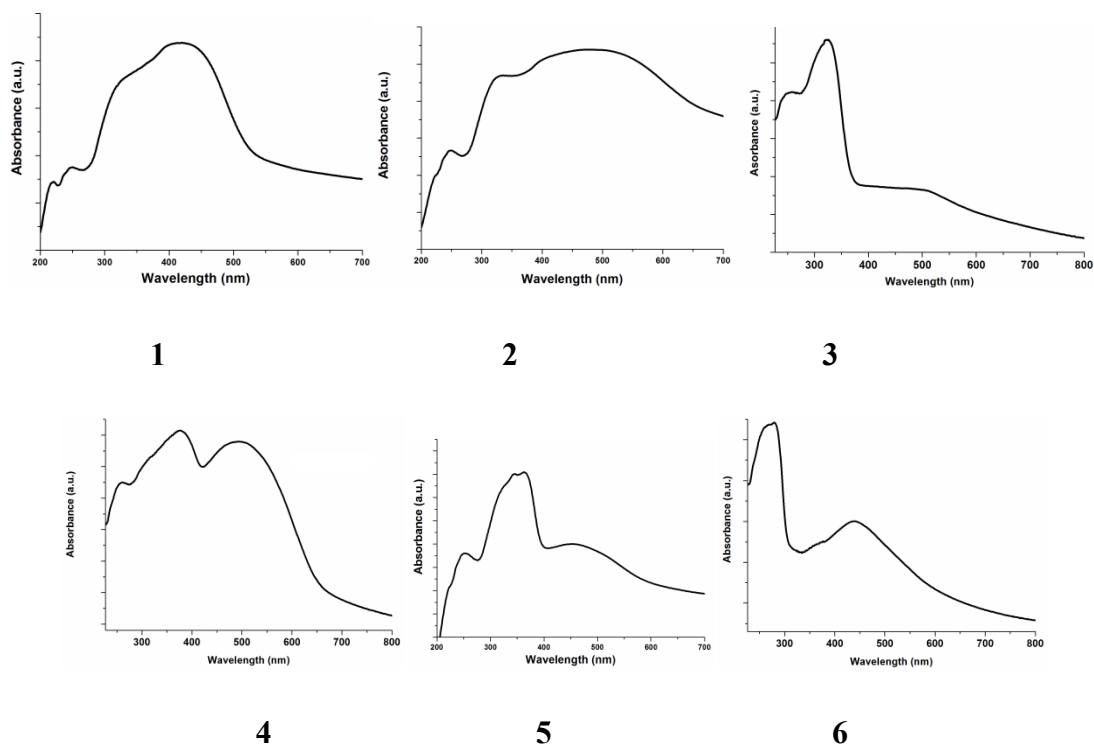

**Figure S3** UV-Visible spectra of 1-6

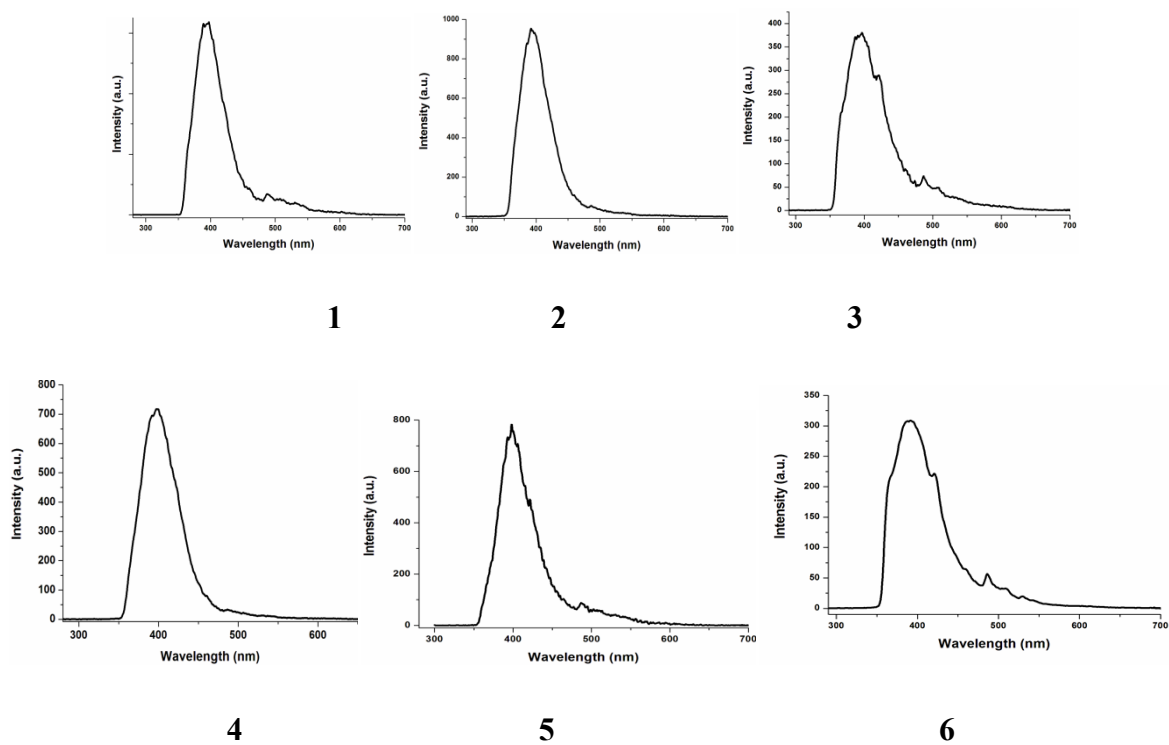

**Figure S4** PL spectra of 1-6

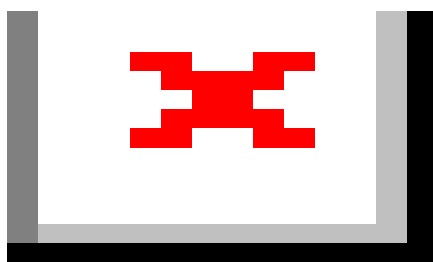

**Figure S5**  $^1\text{H}$  NMR spectra of the ketal product (2-ethyl-2-methyl-[1,3]-dioxolane,  $\delta$  3.92-4.00, m, 4H) from 2-butanone and ethylene glycol ( $\delta$  3.73-3.77, m, 4H). The integration of ketal product and precursor peak areas were used to determine yields

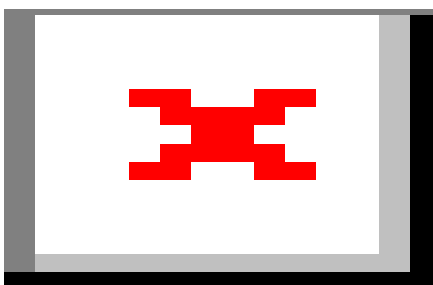

**Figure S6**  $^1\text{H}$  NMR spectra of the ketal product ( $\delta$  3.93-3.96, m, 4H) from 3-pentanone and ethylene glycol ( $\delta$  3.73-3.758, m, 4H). The integration of ketal product and precursor peak areas were used to determine yields

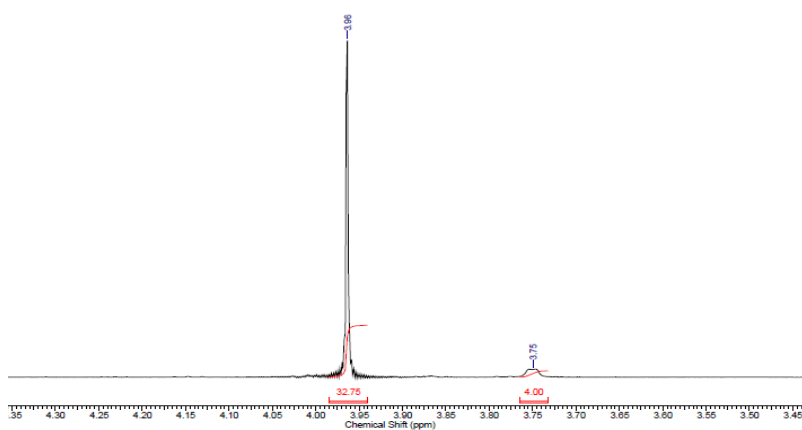

**Figure S7**  $^1\text{H}$  NMR spectra of the ketal product ( $\delta$  3.93-3.98, m, 4H) from acetone and ethylene glycol ( $\delta$  3.73-3.77, m, 4H). The integration of ketal product and precursor peak areas were used to determine yields



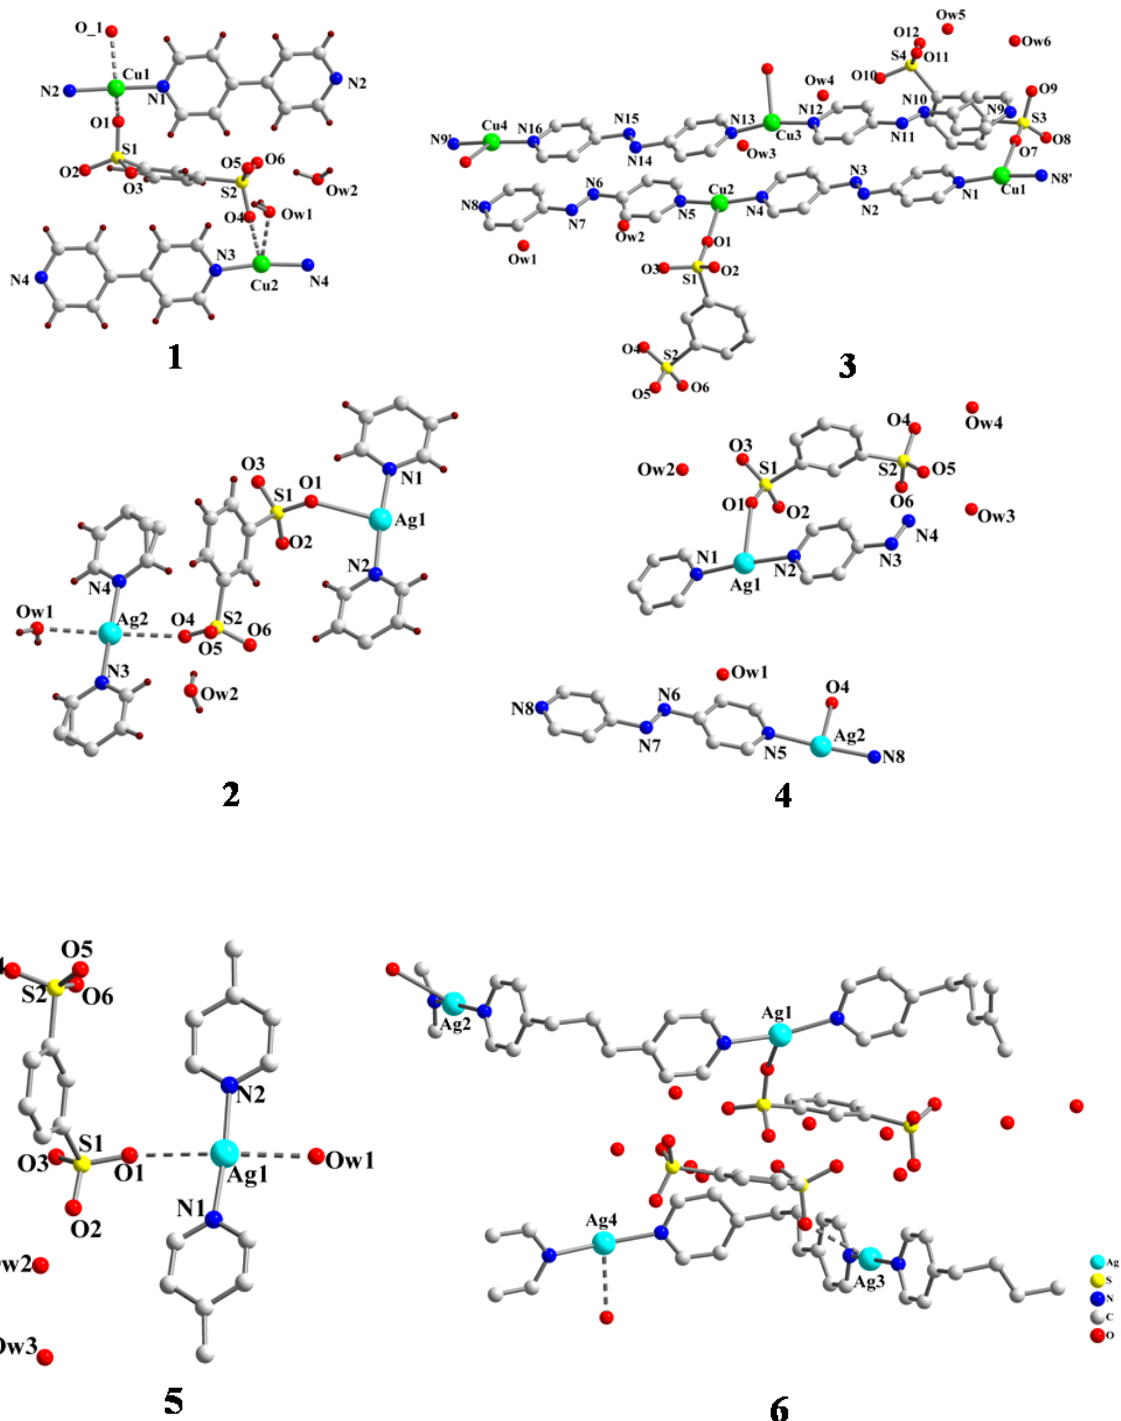

Figure S8 Asymmetric unit of 1-6

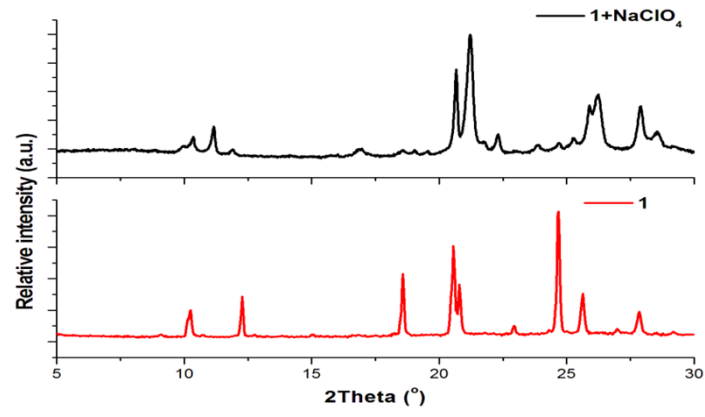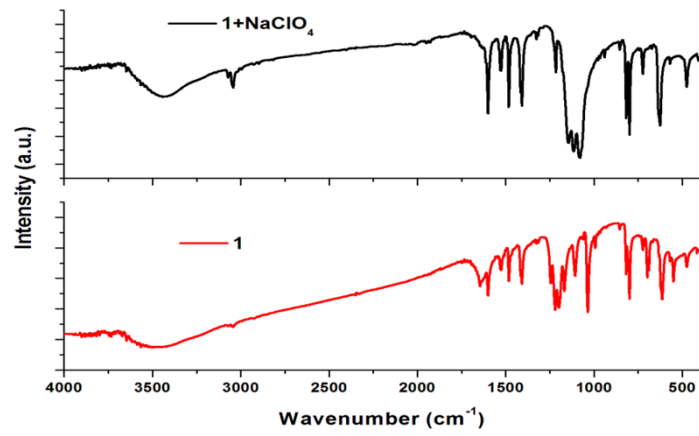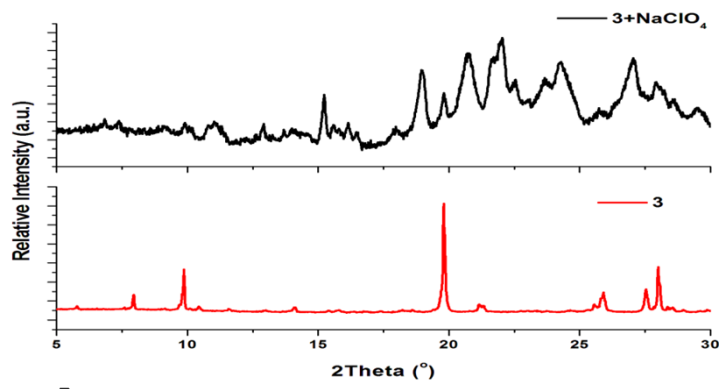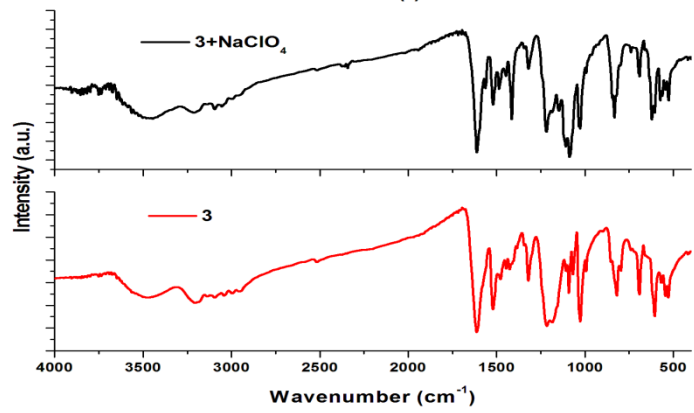

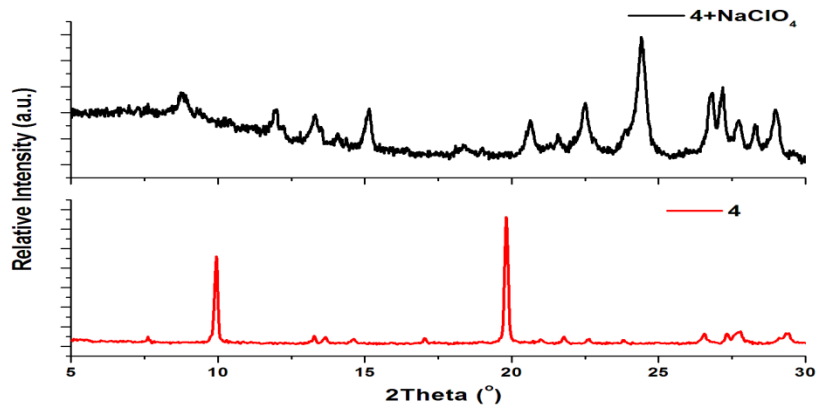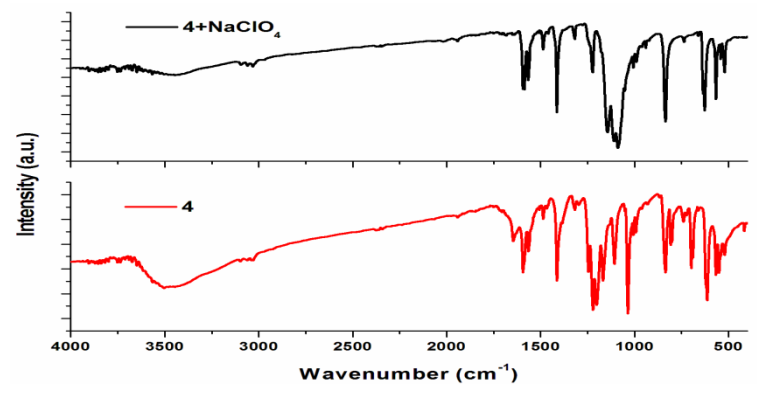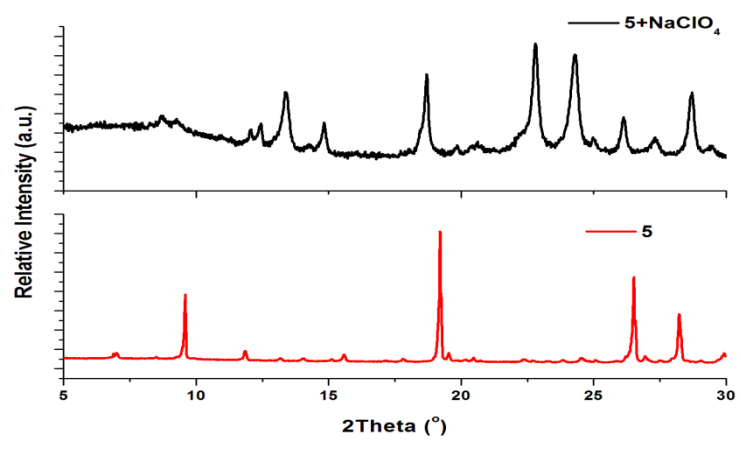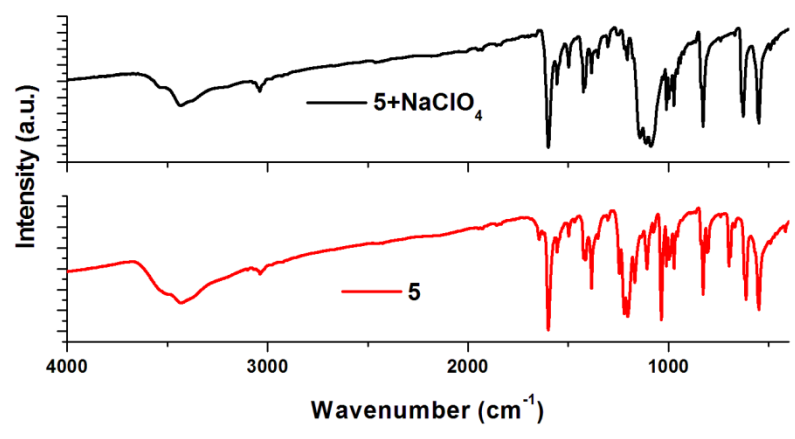

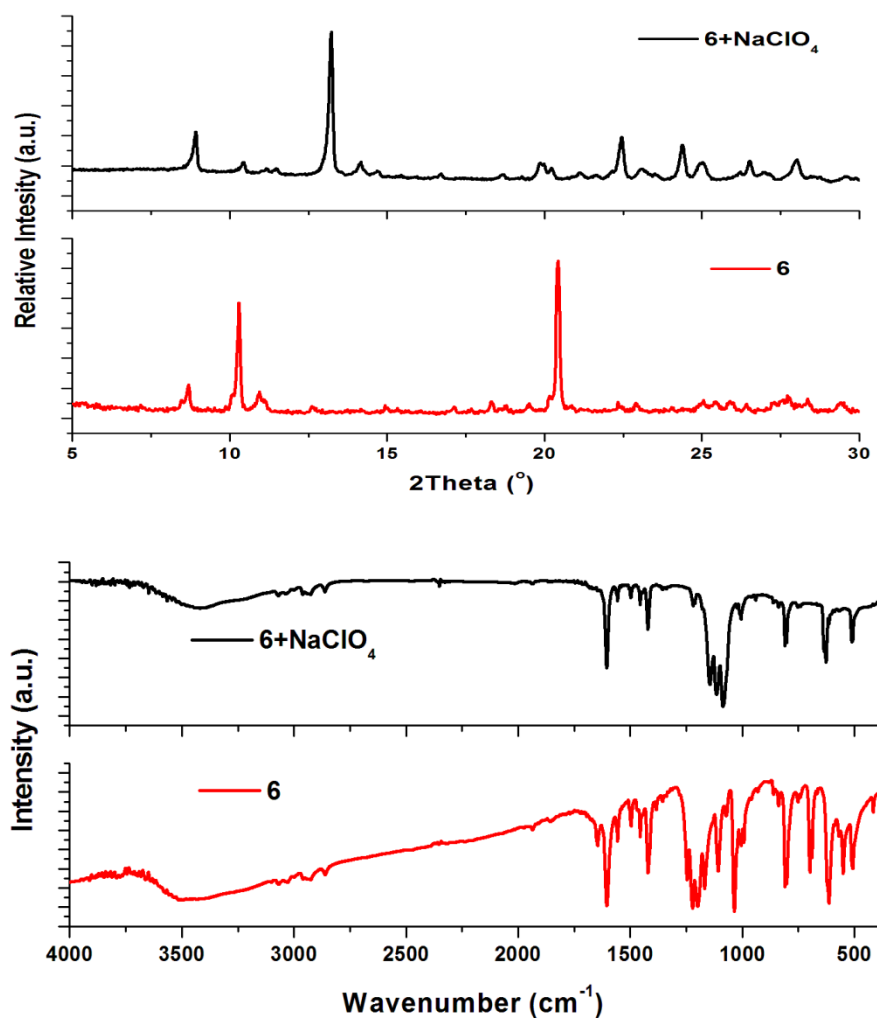

**Figure S9** PXRD and FTIR of **1** and **3-6** for anion exchange with perchlorate. (a) Initial compound (red) (b) exchange products with  $\text{ClO}_4^-$  (black)

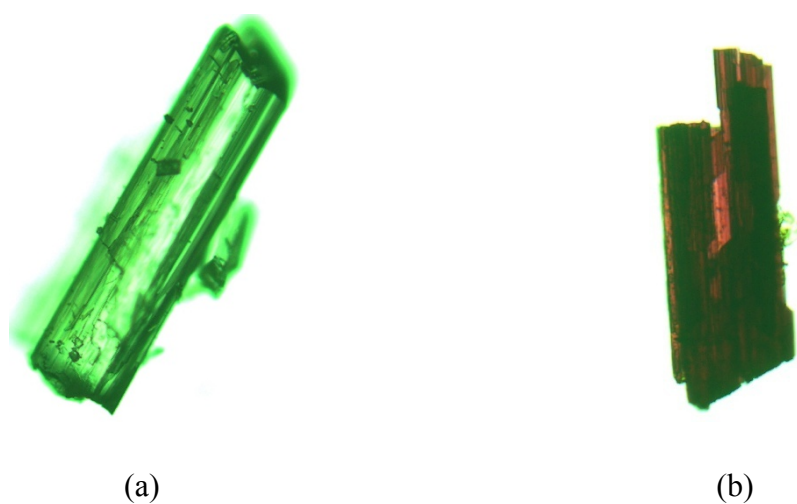

**Figure S10** Color of crystal (a) **2** (b) after exchange with  $\text{MnO}_4^-$
